# Supplementary material
Source: publisher site journal article supplement (https://www.dovepress.com/article/371440)
Supplement: Supplementary file 1 [file get_supplementary_file.php]

## Supplementary tables

Supplementary Table 1 Population with diagnosed and treated COPD for each country

|                                                   | Belgium                 | Germany                 | Sweden                  | United States            |
|---------------------------------------------------|-------------------------|-------------------------|-------------------------|--------------------------|
| <b>Population</b>                                 | 11,492,641 <sup>1</sup> | 73,009,237 <sup>2</sup> | 10,319,473 <sup>3</sup> | 256,416,340 <sup>4</sup> |
| <b>COPD prevalence</b>                            | 4.4% <sup>5</sup>       | 7.6% <sup>6</sup>       | 4.0% <sup>7</sup>       | 6.7% <sup>8,9</sup>      |
| <b>Proportion inhaled use</b>                     | 68.4% <sup>10</sup>     | 87.9% <sup>11</sup>     | 80.0% <sup>7</sup>      | 52.0% <sup>12</sup>      |
| <b>Population with diagnosed and treated COPD</b> | 346,051                 | 4,863,367               | 330,223                 | 8,986,880                |

**Abbreviations:** COPD, chronic obstructive pulmonary disease.

**Supplementary Table 2 Population with diagnosed and treated COPD for each country**

|                                                                                   | <b>Belgium</b>                             | <b>Germany</b>                           | <b>Sweden</b>                            | <b>United States</b>                                                                 |
|-----------------------------------------------------------------------------------|--------------------------------------------|------------------------------------------|------------------------------------------|--------------------------------------------------------------------------------------|
| <b>Low exacerbations/low symptoms, %<br/>(proportion of those with high EOS)</b>  | 19.0 <sup>13</sup><br>(19.5) <sup>14</sup> | 6.4 <sup>11</sup><br>(14) <sup>15</sup>  | 29 <sup>7</sup><br>(27) <sup>16,17</sup> | 43.1 <sup>12</sup> (27) <sup>18</sup>                                                |
| LAMA, %                                                                           | 28.0 <sup>a</sup>                          | 48 <sup>11</sup>                         | 29 <sup>7</sup>                          | 26 <sup>b</sup>                                                                      |
| LABA, %                                                                           | 21.1 <sup>a</sup>                          | 6 <sup>11</sup>                          | 4 <sup>7</sup>                           | NA                                                                                   |
| LAMA/LABA, %                                                                      | 3.4 <sup>a</sup>                           | 15 <sup>11</sup>                         | 24 <sup>7</sup>                          | 12 <sup>b</sup>                                                                      |
| LABA/ICS, %                                                                       | 47.6 <sup>a</sup><br>(19.5) <sup>14</sup>  | 8 <sup>11</sup><br>(4) <sup>15</sup>     | 13 <sup>7</sup><br>(3) <sup>16,17</sup>  | 52 <sup>b</sup> (14) <sup>b</sup>                                                    |
| LAMA/LABA/ICS, %                                                                  | 0.0 <sup>a</sup>                           | 23 <sup>11</sup><br>(10) <sup>15</sup>   | 29 <sup>7</sup><br>(8) <sup>16,17</sup>  | FDC: 3 <sup>b</sup> (1) <sup>b</sup> ;<br>free dose: 7 <sup>b</sup> (2) <sup>b</sup> |
| <b>Low exacerbations/high symptoms, %<br/>(proportion of those with high EOS)</b> | 39.0 <sup>13</sup><br>(20.7) <sup>14</sup> | 44.4 <sup>11</sup><br>(14) <sup>15</sup> | 57 <sup>7</sup><br>(27) <sup>16,17</sup> | 42.4 <sup>12</sup><br>(27) <sup>18</sup>                                             |
| LAMA, %                                                                           | 22.0 <sup>a</sup>                          | 47 <sup>11</sup>                         | 20 <sup>7</sup>                          | 26 <sup>b</sup>                                                                      |
| LABA, %                                                                           | 11.0 <sup>a</sup>                          | 4 <sup>11</sup>                          | 3 <sup>7</sup>                           | NA                                                                                   |
| LAMA/LABA, %                                                                      | 10.3 <sup>a</sup>                          | 17 <sup>11</sup>                         | 28 <sup>7</sup>                          | 12 <sup>b</sup>                                                                      |
| LABA/ICS, %                                                                       | 56.5 <sup>a</sup><br>(20.6) <sup>14</sup>  | 5 <sup>11</sup><br>(2) <sup>15</sup>     | 3 <sup>7</sup><br>(1) <sup>16,17</sup>   | 52 <sup>b</sup><br>(14)                                                              |
| LAMA/LABA/ICS, %                                                                  | 0.3 <sup>a</sup><br>(0.1) <sup>14</sup>    | 27 <sup>11</sup><br>(12) <sup>15</sup>   | 46 <sup>7</sup><br>(13) <sup>16,17</sup> | FDC: 3 <sup>b</sup> (1) <sup>b</sup> ;<br>free dose: 7 <sup>b</sup> (2) <sup>b</sup> |

|                                                                                                    | Belgium                                    | Germany                                  | Sweden                                   | United States                                                                            |
|----------------------------------------------------------------------------------------------------|--------------------------------------------|------------------------------------------|------------------------------------------|------------------------------------------------------------------------------------------|
| <b>High exacerbations/low symptoms, %<br/>(proportion of those with high EOS)</b>                  | 18.0 <sup>13</sup><br>(20.3) <sup>14</sup> | 3.2 <sup>11</sup><br>(14) <sup>15</sup>  | 2 <sup>7</sup><br>(27) <sup>16,17</sup>  | 4.2 <sup>12</sup><br>(27) <sup>18</sup>                                                  |
| LAMA, %                                                                                            | 12.1 <sup>a</sup>                          | 37 <sup>11</sup>                         | 15 <sup>7</sup>                          | 21 <sup>b</sup>                                                                          |
| LABA, %                                                                                            | 1.7 <sup>a</sup>                           | 4 <sup>11</sup>                          | 4 <sup>7</sup>                           | NA                                                                                       |
| LAMA/LABA, %                                                                                       | 9.4 <sup>a</sup>                           | 19 <sup>11</sup>                         | 22 <sup>7</sup>                          | 9 <sup>b</sup>                                                                           |
| LABA/ICS, %                                                                                        | 75.7 <sup>a</sup><br>(20.0) <sup>14</sup>  | 4 <sup>11</sup><br>(1) <sup>15</sup>     | 4 <sup>7</sup><br>(1) <sup>16,17</sup>   | 51 <sup>b</sup><br>(14) <sup>b</sup>                                                     |
| LAMA/LABA/ICS, %                                                                                   | 1.11 <sup>a</sup><br>(0.3) <sup>14</sup>   | 36 <sup>11</sup><br>(13) <sup>15</sup>   | 55 <sup>7</sup><br>(15) <sup>16,17</sup> | FDC: 6 <sup>b</sup> (1) <sup>b</sup> ;<br>free dose: 13 <sup>b</sup><br>(3) <sup>b</sup> |
| <b>High exacerbations/high symptoms,<br/>% (proportion of those with high<br/>EOS)<sup>c</sup></b> | 24.0 <sup>13</sup><br>(19.2) <sup>14</sup> | 46.0 <sup>11</sup><br>(14) <sup>15</sup> | 12 <sup>7</sup><br>(27) <sup>16,17</sup> | 10.4 <sup>12</sup><br>(27) <sup>18</sup>                                                 |
| LAMA, %                                                                                            | 2.3                                        | 38                                       | 7                                        | 21                                                                                       |
| LABA, %                                                                                            | 0.9                                        | 3                                        | 2                                        | NA                                                                                       |
| LAMA/LABA, %                                                                                       | 13.9                                       | 18                                       | 16                                       | 9                                                                                        |
| LABA/ICS, %                                                                                        | 78.4 (18.1)                                | 3 (1)                                    | 2 (0)                                    | 51 (14)                                                                                  |
| LAMA/LABA/ICS, %                                                                                   | 4.6 (1.1)                                  | 38 (13)                                  | 74 (20)                                  | FDC: 6 (1); free<br>dose: 13 (3)                                                         |

**Notes:** <sup>a</sup>IM Associates: Patient Data for 2018. Belgium. <sup>b</sup>Personal communication with the authors of Palli et al 2020.<sup>19</sup> <sup>c</sup>EOS figures were applied in Germany for the GOLD guideline setting only.

**Abbreviations:** COPD, chronic obstructive pulmonary disease; EOS, eosinophils; FDC, fixed-dose combination; ICS, inhaled corticosteroids; LABA, long-acting  $\beta_2$  agonist; LAMA, long-acting muscarinic antagonist.

**Supplementary Table 3 Exacerbation and pneumonia rates**

| <b>Exacerbation rates (annual)</b>                          |                                         |                                   |
|-------------------------------------------------------------|-----------------------------------------|-----------------------------------|
| Absolute risk with no prior exacerbations for LAMA/LABA (%) |                                         |                                   |
| Moderate                                                    | 7.13 <sup>20</sup>                      |                                   |
| Severe                                                      | 2.41 <sup>20</sup>                      |                                   |
| Relative risk                                               |                                         |                                   |
|                                                             | No prior exacerbations <sup>20-22</sup> | Prior exacerbations <sup>23</sup> |
| LAMA                                                        | 1.11                                    | 4.63                              |
| LABA                                                        | 1.28                                    | 5.34                              |
| LAMA/LABA                                                   | 1.00                                    | 4.17                              |
| LABA/ICS                                                    | 1.15                                    | 4.79                              |
| LAMA/LABA/ICS                                               | 0.87                                    | 3.62                              |
| <b>Pneumonia rates (annual)</b>                             |                                         |                                   |
| Absolute risk for LAMA/LABA (%)                             |                                         |                                   |
| Mild to moderate                                            | 1.67 <sup>24</sup>                      |                                   |
| Severe                                                      | 3.08 <sup>24</sup>                      |                                   |
| Relative risk for all therapies                             |                                         |                                   |
|                                                             | Mild to moderate <sup>24</sup>          | Severe <sup>24</sup>              |
| LAMA                                                        | 1.00                                    | 1.00                              |
| LABA                                                        | 1.00                                    | 1.00                              |
| LAMA/LABA                                                   | 1.00                                    | 1.00                              |
| LABA/ICS                                                    | 1.31                                    | 1.70                              |
| LAMA/LABA/ICS                                               | 1.31                                    | 1.70                              |

**Abbreviations:** COPD, chronic obstructive pulmonary disease; ICS, inhaled corticosteroids; LABA, long-acting  $\beta_2$  agonist; LAMA, long-acting muscarinic antagonist.

**Supplementary Table 4 Cost estimate for treatment, exacerbations and pneumonia**

|                         | Belgium (€)             | Germany (€)                     | Sweden (Kroner)         | United States (\$)                                            |
|-------------------------|-------------------------|---------------------------------|-------------------------|---------------------------------------------------------------|
| <b>Treatment</b>        |                         |                                 |                         |                                                               |
| LAMA                    | 306.46 <sup>25</sup>    | 596.63 <sup>a</sup>             | 3778.49 <sup>26</sup>   | 3906.52 <sup>b</sup>                                          |
| LABA                    | 251.91 <sup>25</sup>    | 280.63 <sup>a</sup>             | 3900.03 <sup>26</sup>   | NA                                                            |
| LAMA/LABA               | 437.54 <sup>25</sup>    | 722.32 <sup>a</sup>             | 5376.11 <sup>26</sup>   | 4086.62 <sup>b</sup>                                          |
| LABA/ICS                | 379.16 <sup>25</sup>    | 669.52 <sup>a</sup>             | 5972.22 <sup>26</sup>   | 3796.28 <sup>b</sup>                                          |
| LAMA/LABA/ICS           | 589.35 <sup>25</sup>    | 886.22 <sup>a</sup>             | 7278.13 <sup>26</sup>   | FDC: 7208.57 <sup>b,c</sup> ; free dose: 7716.26 <sup>b</sup> |
| <b>Exacerbations</b>    |                         |                                 |                         |                                                               |
| Moderate                | 48.26 <sup>25,27</sup>  | 60.85 <sup>28</sup>             | 2556.04 <sup>27</sup>   | 192.70 <sup>d</sup>                                           |
| Severe                  | 6352.5 <sup>25,27</sup> | 3334.50 <sup>11,29,30</sup>     | 53,137.00 <sup>27</sup> | 15,721.23 <sup>d</sup>                                        |
| <b>Pneumonia events</b> |                         |                                 |                         |                                                               |
| Mild to moderate        | 61.36 <sup>31</sup>     | 66.01 <sup>11,28–30,32–34</sup> | 5024.60 <sup>31</sup>   | 254.39 <sup>e</sup>                                           |
| Severe                  | 6055.7 <sup>31</sup>    | 3779.14 <sup>34–36</sup>        | 60,200.00 <sup>31</sup> | 18,677.44 <sup>e</sup>                                        |

**Notes:** <sup>a</sup>Calculated based on drug cost data from Lauer-Taxe<sup>® 37</sup> and market shares from the IQVIA PharmaScope<sup>®</sup> National database.<sup>38</sup> Basis: Boehringer Ingelheim, own calculation. <sup>b</sup>Personal communication with the authors of Palli et al 2020.<sup>19</sup> <sup>c</sup>US: FDC: Weighted average based on assumed market share 90:10 Trelegy: Breztri Trelegy Ellipta;<sup>39</sup> Breztri Aerosphere.<sup>39</sup> <sup>d</sup>Moderate exacerbation cost: Weighted average of mean ambulatory visit cost (90%) and mean emergency department visit cost (10%). Defined as claims with a diagnosis of COPD in the primary position. Severe exacerbation cost: Mean cost per acute inpatient stay with a primary diagnosis of COPD. <sup>e</sup>Mild-to-moderate pneumonia events: Weighted average of mean ambulatory visit cost (83%) and emergency department visit cost (17%). Claims with a diagnosis for pneumonia or acute bronchitis/bronchiolitis in any position. Severe pneumonia events: Mean cost per acute inpatient stay with a diagnosis for pneumonia or acute bronchitis/bronchiolitis in any position.

**Abbreviations:** COPD, chronic obstructive pulmonary disease; FDC, fixed-dose combination; ICS, inhaled corticosteroids; LABA, long-acting  $\beta_2$  agonist; LAMA, long-acting muscarinic antagonist.

## Supplementary references

1. Statbel. Statbel. Belgium in figures. Published 2020. Accessed April 20, 2020.  
<https://statbel.fgov.be/en>
2. Statistisches Bundesamt. Demographics of Germany. Published 2020. Accessed June 1, 2020. <http://www.destatis.de/>
3. SCB Statistics Sweden. Population statistics. Published 2020. Accessed June 30, 2020.  
<https://www.scb.se/en/>
4. United States Census Bureau. American Community Survey, S0101. Published 2020. Accessed November 11, 2020. <https://data.census.gov/cedsci/>
5. Mertens E, Sagastume D, Peñalvo JL. Quantification of disparities in the distribution of lifestyle and metabolic risk factors, prevalence of non-communicable diseases and related mortality: the Belgian Health Interview Surveys 1997–2018. *BMJ Open*. 2021;11(11):e053260.
6. Geldmacher H, Biller H, Herbst A, et al. [The prevalence of chronic obstructive pulmonary disease (COPD) in Germany. Results of the BOLD study]. *Dtsch Med Wochenschr*. 2008;133(50):2609-2614.
7. Swedish National Airways Register. [Luftvägsregistret]. Published 2020. Accessed June 30, 2020. <https://lvr.registercentrum.se/nyheter?year=2020>
8. Centers for Disease Control and Prevention. Chronic Disease Indicators. Published 2020. Accessed February 10, 2020. <https://nccd.cdc.gov/cdi>
9. Mendy A, Forno E, Niyonsenga T, Carnahan R, Gasana J. Prevalence and features of asthma-COPD overlap in the United States 2007-2012. *Clin Respir J*. 2018;12(8):2369-2377.
10. de Cock J. Monitoring of reimbursement significant expenses. Published 2020. Accessed June 1, 2020. <https://www.inami.fgov.be/SiteCollectionDocuments/morse-report-2019.pdf>
11. Worth H, Buhl R, Criée CP, Kardos P, Mailänder C, Vogelmeier C. The “real-life” COPD patient in Germany: the DACCORD study. *Respir Med*. 2016;111:64-71.

12. Palli SR, Zhou S, Shaikh A, Willey VJ. Effect of compliance with GOLD treatment recommendations on COPD health care resource utilization, cost, and exacerbations among patients with COPD on maintenance therapy. *J Manag Care Spec Pharm*. 2021;27(5):625-637.
13. Ferreira AJ, Bakke P, Ekroos H, et al. Investigating the drivers for COPD treatment decisions. *Eur Respir J*. 2021;58(suppl 65):PA2413.
14. Gayle A, Dickinson S, Morris K, Poole C, Mathioudakis AG, Vestbo J. What is the impact of GOLD 2017 recommendations in primary care? – a descriptive study of patient classifications, treatment burden and costs. *Int J Chron Obstruct Pulmon Dis*. 2018;13:3485-3492.
15. Greulich T, Mager S, Lucke T, et al. Longitudinal stability of blood eosinophil count strata in the COPD COSYCONET cohort. *Int J Chron Obstruct Pulmon Dis*. 2018;13:2999-3002.
16. Ellingsen J, Janson C, Bröms K, et al. Longitudinal measurements of blood eosinophils in relation to COPD outcomes. *Eur Respir J*. 2018;52(suppl 62):PA2015.
17. Sulku J, Janson C, Melhus H, et al. A cross-sectional study assessing appropriateness of inhaled corticosteroid treatment in primary and secondary care patients with COPD in Sweden. *Int J Chron Obstruct Pulmon Dis*. 2019;14:2451-2460.
18. Vogelmeier CF, Kostikas K, Fang J, et al. Evaluation of exacerbations and blood eosinophils in UK and US COPD populations. *Respir Res*. 2019;20(1):178.
19. Palli SR, Frazer M, DuCharme M, Buikema AR, Anderson AJ, Franchino-Elder J. Differences in real-world health and economic outcomes among patients with COPD treated with combination tiotropium/olodaterol versus triple therapy. *J Manag Care Spec Pharm*. 2020;26(10):1363-1374.
20. Oba Y, Keeney E, Ghatehorde N, Dias S. Dual combination therapy versus long-acting bronchodilators alone for chronic obstructive pulmonary disease (COPD): a systematic review and network meta-analysis. *Cochrane Database Syst Rev*. 2018;12(12):CD012620.

21. Cazzola M, Rogliani P, Calzetta L, Matera MG. Triple therapy versus single and dual long-acting bronchodilator therapy in chronic obstructive pulmonary disease: a systematic review and meta-analysis. *Eur Respir J*. 2018;52(6):1801586.
22. Axson EL, Lewis A, Potts J, et al. Inhaled therapies for chronic obstructive pulmonary disease: a systematic review and meta-analysis. *BMJ open*. 2020;10(9):e036455.
23. Hurst JR, Vestbo J, Anzueto A, et al. Susceptibility to exacerbation in chronic obstructive pulmonary disease. *New Engl J Med*. 2010;363(12):1128-1138.
24. Singh S, Amin A v, Loke YK. Long-term use of inhaled corticosteroids and the risk of pneumonia in chronic obstructive pulmonary disease: a meta-analysis. *Arch Intern Med*. 2009;169(3):219-229.
25. RIZIV. [Webtoepassing Vergoedbare geneesmiddelen] Web application. Reimbursable medicines. Published 2020. Accessed June 15, 2020.  
<https://ondpanon.riziv.fgov.be/SSPWebApplicationPublic/nl/Public/ProductSearch>
26. Läkemedelsförmånsverket. Pris-och beslutsdatabasen. Published 2020. Accessed July 1, 2020. <https://www.tlv.se/beslut/sok-i-databasen.html>
27. National Institute for Health and Care Excellence. Chronic obstructive disease in over 16s: diagnosis and management. Economic model report. NICE Guideline NG115. Published 2018. Accessed September 16, 2021.  
<https://www.nice.org.uk/guidance/ng115/evidence/h-economic-model-report-pdf-6602768757>
28. Wacker ME, Jörres RA, Schulz H, et al. Direct and indirect costs of COPD and its comorbidities: results from the German COSYCONET study. *Respir Med*. 2016;111:39-46.
29. Bowles D, Graf von der Schulenburg JM. [Economic valuation of physician contacts in German outpatient care of COPD. Results from a survey of general practitioners and respiratory specialists]. *Pneumologie (Stuttgart, Germany)*. 2011;65(6):379-387.
30. Leo F, Menger H. [Exacerbations of chronic obstructive pulmonary disease - diagnostic approach, management and follow-up care]. *Dtsch Med Wochenschr*. 2019;144(1):21-27.

31. Eccles S, Pincus C, Higgins B, Woodhead M. Diagnosis and management of community and hospital acquired pneumonia in adults: summary of NICE guidance. *BMJ*. 2014;349:g6722.
32. Deutsches Institut für Medizinische Dokumentation und Information (DIMDI). Festbetragsdatenbank [Fixed price database]. Published 2020. Accessed May 15, 2020. <https://www.dimdi.de/dynamic/de/arzneimittel/downloads/?dir=/festbetrage/>
33. Kassenärztliche Bundesvereinigung (KBV). Einheitlicher Bewertungsmaßstab (EBM). Stand: 2. Quartal 2020 [Uniform Evaluation Standard. Status: 2nd Quarter 2020]. Published 2020. Accessed May 11, 2020. [https://www.kbv.de/media/sp/EBM\\_2Q2020\\_Internet.pdf](https://www.kbv.de/media/sp/EBM_2Q2020_Internet.pdf)
34. Ewig S, Höffken G, Kern W v, et al. [Management of adult community-acquired pneumonia and prevention - update 2016]. *Pneumologie*. 2016;70(3):151-200.
35. InEK – Institut für das Entgeltsystem im Krankenhaus. Fallpauschalen-Katalog 2020. Published 2020. Accessed September 16, 2021. [https://www.g-drg.de/aG-DRG-System\\_2020/Fallpauschalen-Katalog/Fallpauschalen-Katalog\\_2020](https://www.g-drg.de/aG-DRG-System_2020/Fallpauschalen-Katalog/Fallpauschalen-Katalog_2020)
36. InEK – Institut für das Entgeltsystem im Krankenhaus. aG-DRG-report-browser 2020. Published 2020. Accessed October 11, 2021. [https://www.g-drg.de/Datenbrowser\\_und\\_Begleitforschung/G-DRG-Report-Browser/aG-DRG-Report-Browser\\_2020](https://www.g-drg.de/Datenbrowser_und_Begleitforschung/G-DRG-Report-Browser/aG-DRG-Report-Browser_2020)
37. LAUER-FISCHER GmbH. LAUER-TAXE® Online 4.0. Published 2020. Accessed March 1, 2020. <https://portal.cgmlauer.cgm.com/>
38. IQVIA. IQVIA PharmaScope® National. 2019.
39. IBM. Micromedex RED BOOK. Published 2020. Accessed September 16, 2021. <https://www.ibm.com/products/micromedex-red-book>
